# Supplementary material
Source: ML conference proceedings conference paper supplement (https://proceedings.neurips.cc/paper_files/paper/2011/hash/52c670999cdef4b09eb656850da777c4-Abstract.html)
Supplement: Supplementary file 3 [file 52c670999cdef4b09eb656850da777c4-Supplemental.zip]

Archive with 2 entries (2 files):
- all/Paper 1271/nips2011_appendix.pdf
- all/Paper 1271/nips2011_body.pdf
